# Supplementary material for: Ordering-Driven Biaxial Strain Engineering in PtNi Intermetallic Nanowires for Oxygen Reduction Catalysis
Source: Research Square preprint supplement (doi:10.21203/rs.3.rs-8293337/v1), 2025-12-09
Supplement: Supplementary file 1 [file 31be69d33165ba6fc2414f36.pdf]

*Supporting information for*

**Ordering-Driven Biaxial Strain Engineering in PtNi  
Intermetallic Nanowires for Oxygen Reduction Catalysis**

*Xing Hu<sup>1,4</sup>, Shize Geng<sup>2,4</sup>, Yu Cao<sup>3,4</sup>, Kezhu Jiang<sup>1,\*</sup>, Yibo Liu<sup>1</sup>, Ruifan Li<sup>1</sup>, Yangyang Zhang<sup>1</sup>, Shuang Meng<sup>1</sup>, Shan Zhu<sup>1</sup>, Lingzheng Bu<sup>2,\*</sup>, Cong Chen<sup>1,\*</sup> and Shijian Zheng<sup>1,\*</sup>*

<sup>1</sup>Tianjin Key Laboratory of Materials Laminating Fabrication and Interface Control Technology,  
School of Materials Science and Engineering, Hebei University of Technology, Tianjin, 300401,  
China.

<sup>2</sup>College of Energy, Xiamen University, Xiamen, 361102, China.

<sup>3</sup>School of Mechanical and Resource Engineering, WuZhou University, Wuzhou, 543002, China

<sup>4</sup>These authors contributed equally: Xing Hu, Shize Geng, Yu Cao

\*E-mail: kzjiang@hebut.edu.cn, lzbu@xmu.edu.cn, chencong@hebut.edu.cn, sjzheng@hebut.edu.cn

**This supplementary file includes:**

Supplementary Figures. S1 to 29

Supplementary Tables S1 to 3

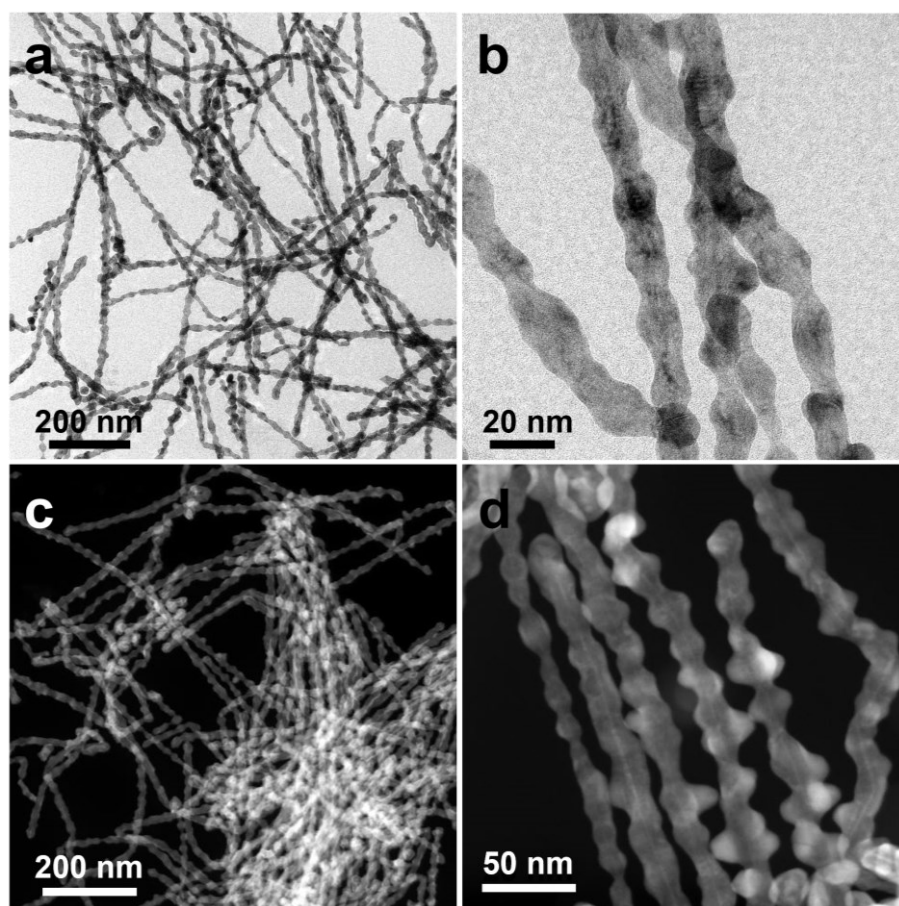

**Figure S1.** (a, b) TEM images and (c, d) STEM images of I-PtNi NWs.

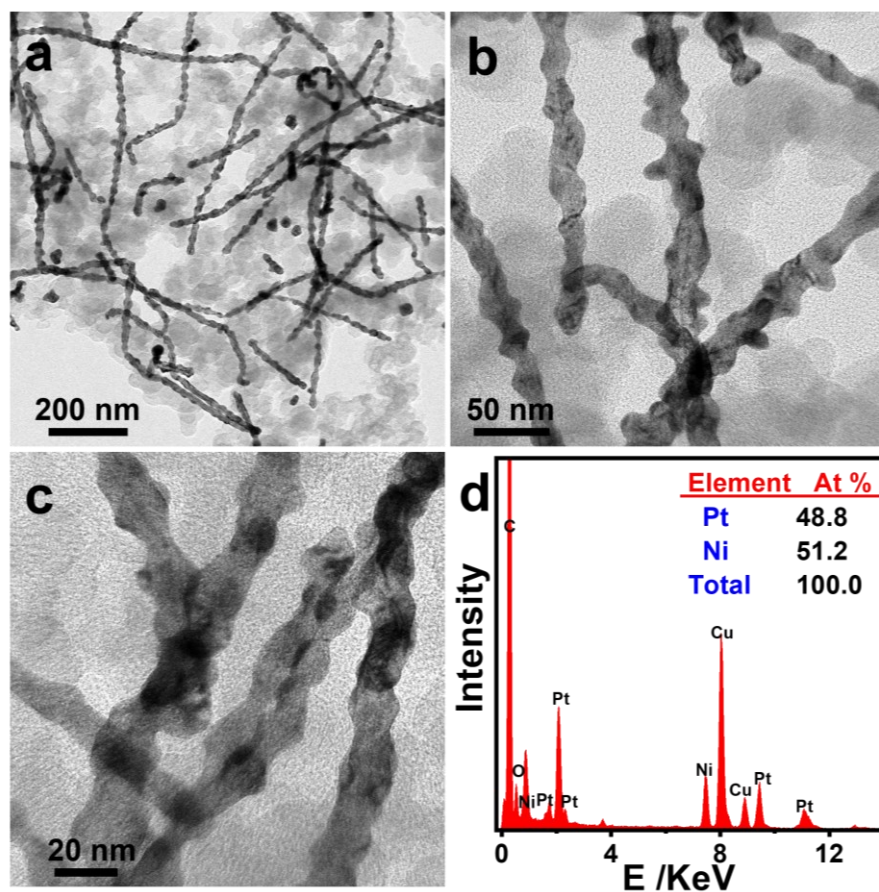

**Figure S2.** (a-c) TEM images and (d) EDS pattern of I-PtNi NWs/C.

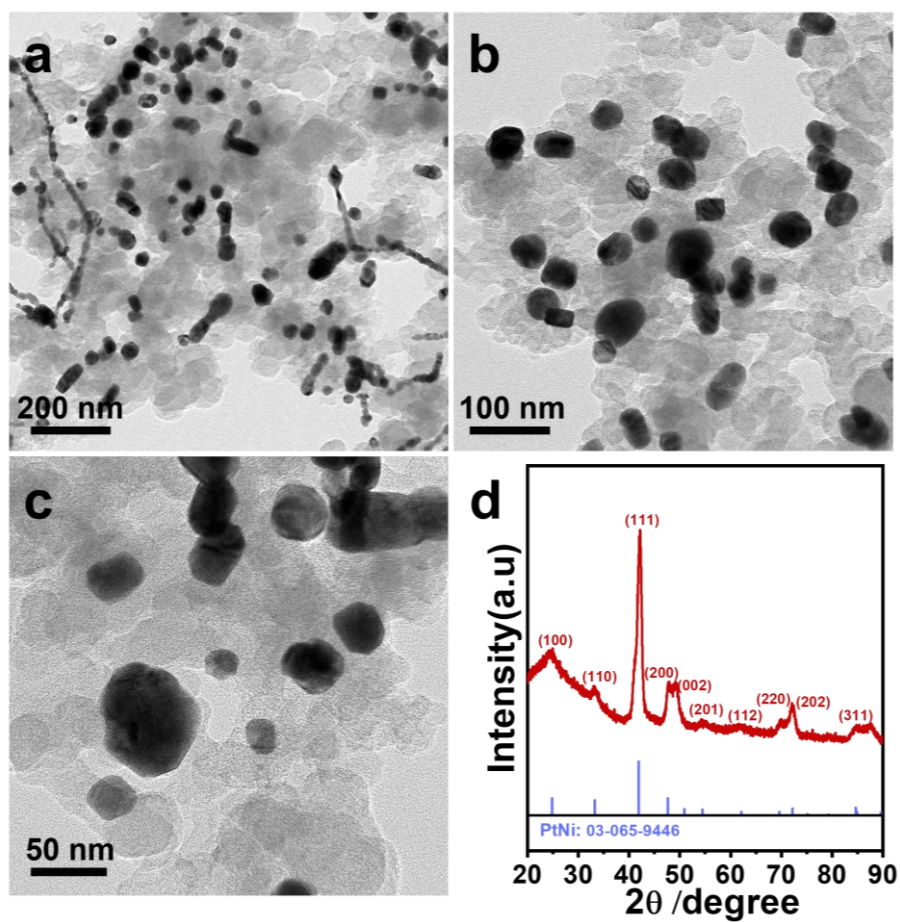

**Figure S3.** (a-c) TEM images and (d) XRD pattern of I-PtNi NWs/C annealed under Ar at 550°C for 5 h.

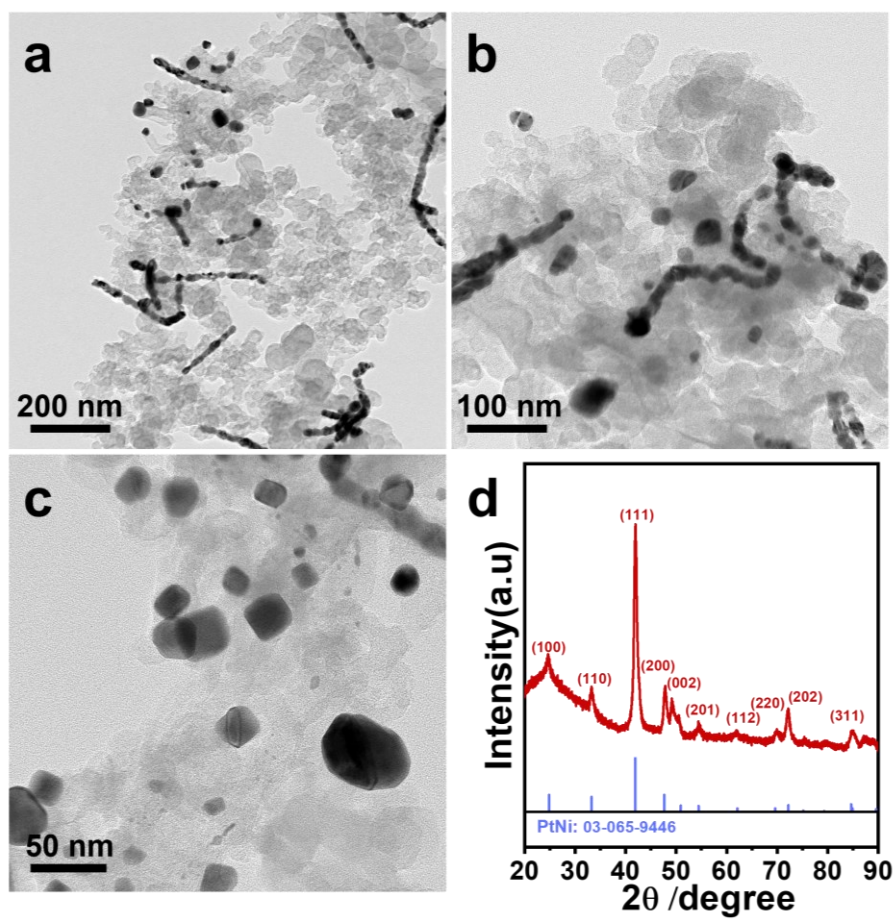

**Figure S4.** (a-c) TEM images and (d) XRD pattern of I-PtNi NWs/C annealed under vacuum (-0.1 MPa) at 550°C for 5 h.

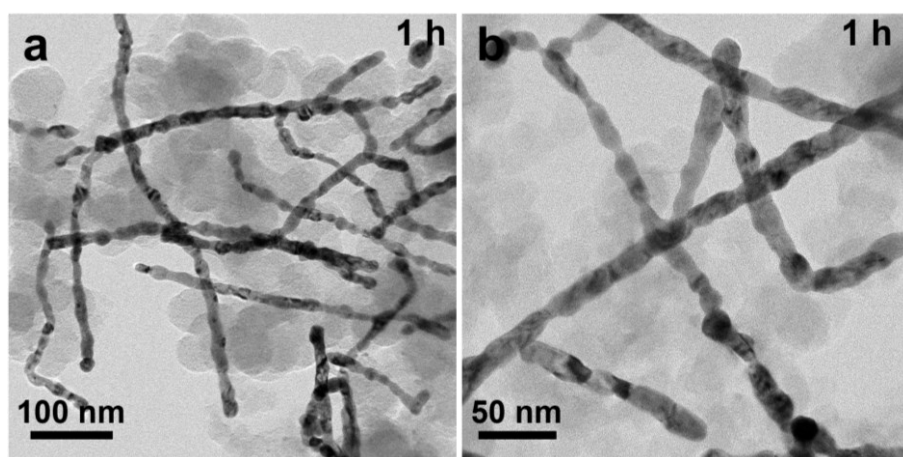

**Figure S5.** TEM images of I-PtNi NWs/C annealed at 550°C for 1 h.

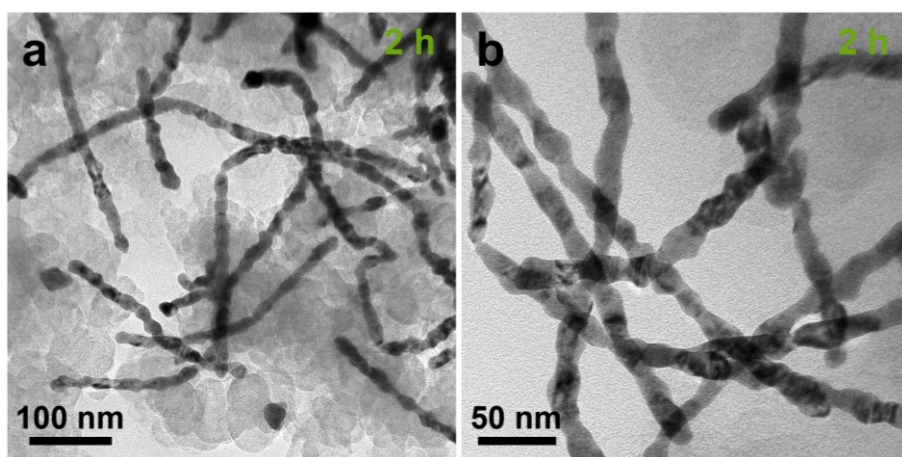

**Figure S6.** TEM images of I-PtNi NWs/C annealed at 550°C for 2 h.



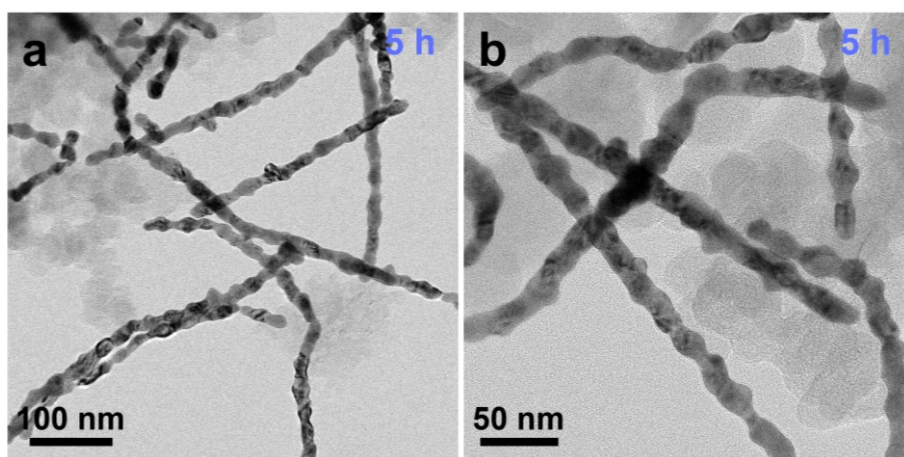

**Figure S7.** TEM images of I-PtNi NWs/C annealed at 550°C for 5 h.



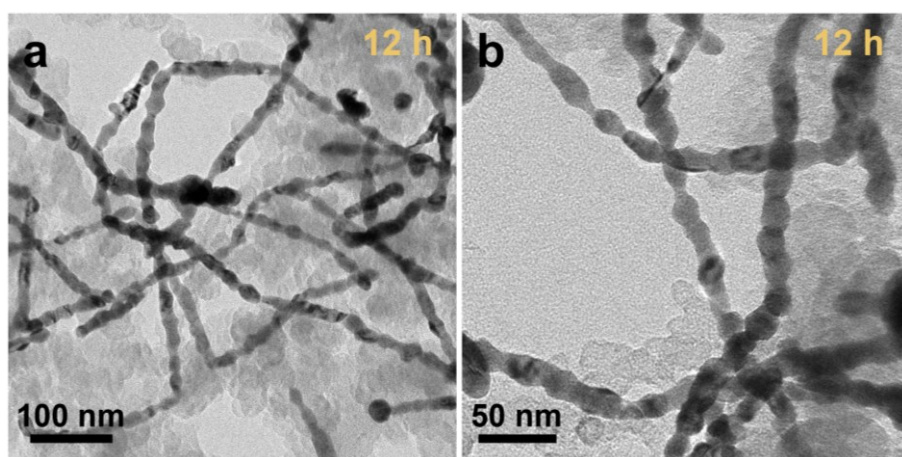

**Figure S8.** TEM images of I-PtNi NWs/C annealed at 550°C for 12 h.

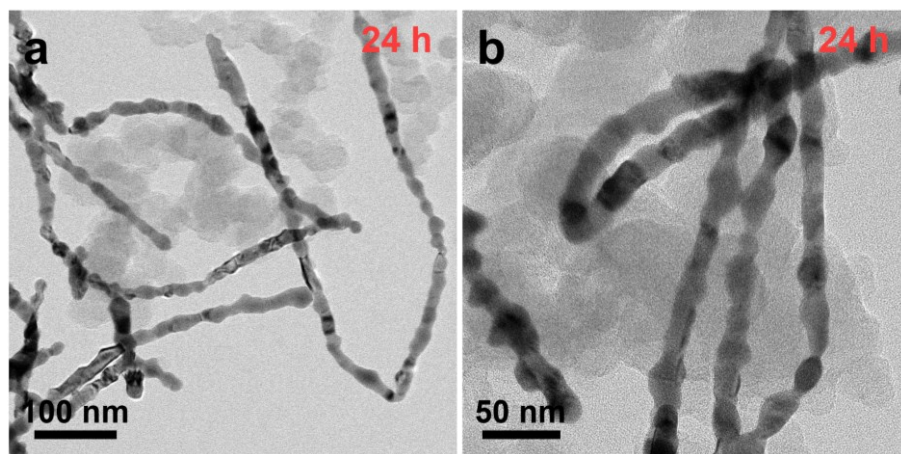

**Figure S9.** TEM images of I-PtNi NWs/C annealed at 550°C for 24 h.

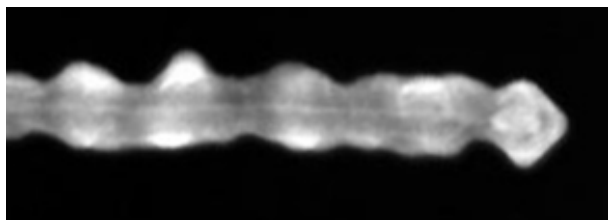

**Figure S10.** STEM image of I-PtNi NWs/C.

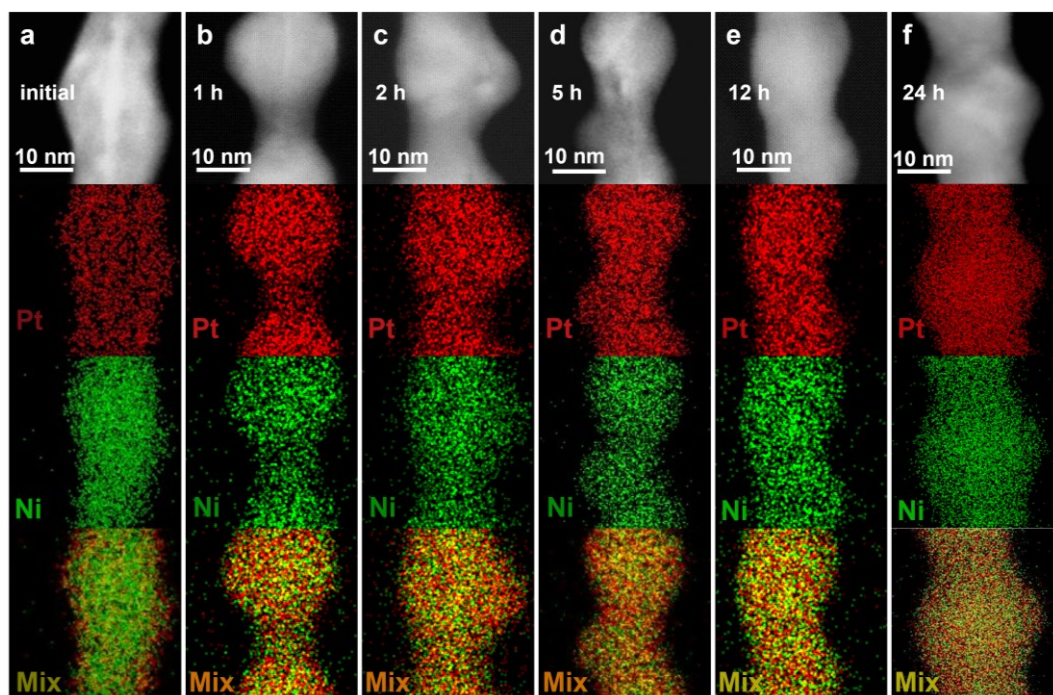

**Figure S11.** STEM images and STEM-EDS elemental mappings of I-PtNi NWs/C annealed at 550°C for (a) 0 h; (b) 1 h; (c) 2 h; (d) 5 h; (e) 12 h and (f) 24 h.

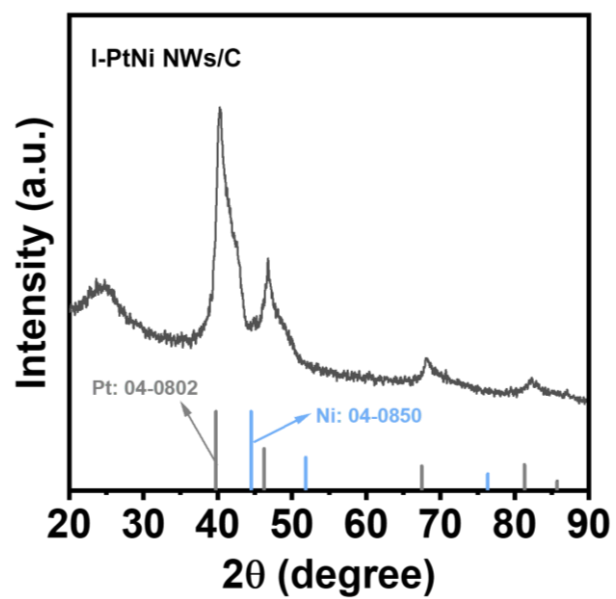

**Figure S12.** XRD pattern of I-PtNi NWs/C.

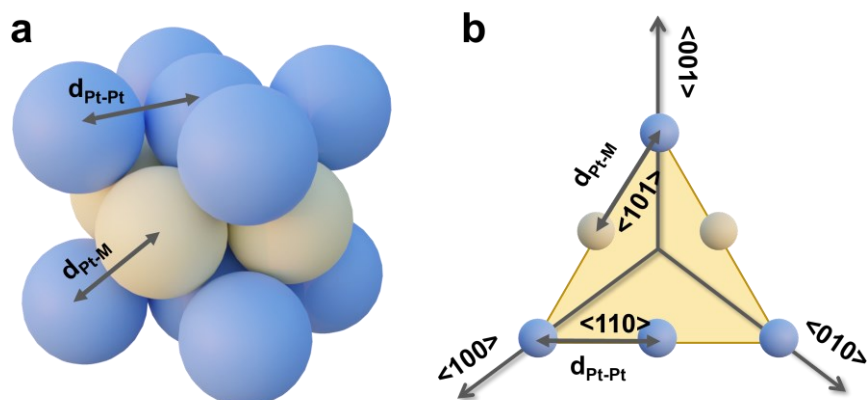

**Figure S13.** (a) Crystal structure of L1<sub>0</sub>-PtNi. The lattice constant is  $a = b = 3.823 \text{ \AA}$ ,  $c = 3.589 \text{ \AA}$ . (b) Schematic illustration of lattice mismatch on (111) facet. Blue and yellow spheres represent Pt and Ni atoms, respectively. Yellow plane represents (111) facet.

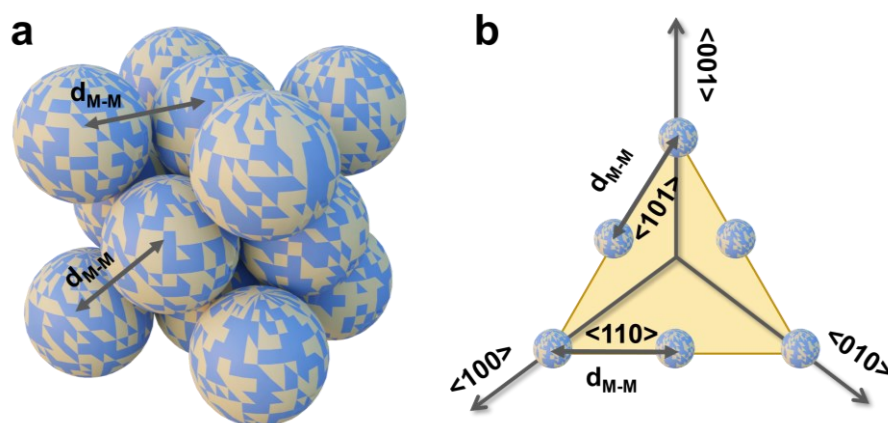

**Figure S14.** (a) Crystal structure of fcc-PtNi (M = Pt or Ni). The lattice constant is  $a = b = c = 3.750 \text{ \AA}$ . (b) Schematic illustration of lattice mismatch on (111) facet. Spheres represent Pt or Ni atoms, respectively. Yellow plane represents (111) facet.



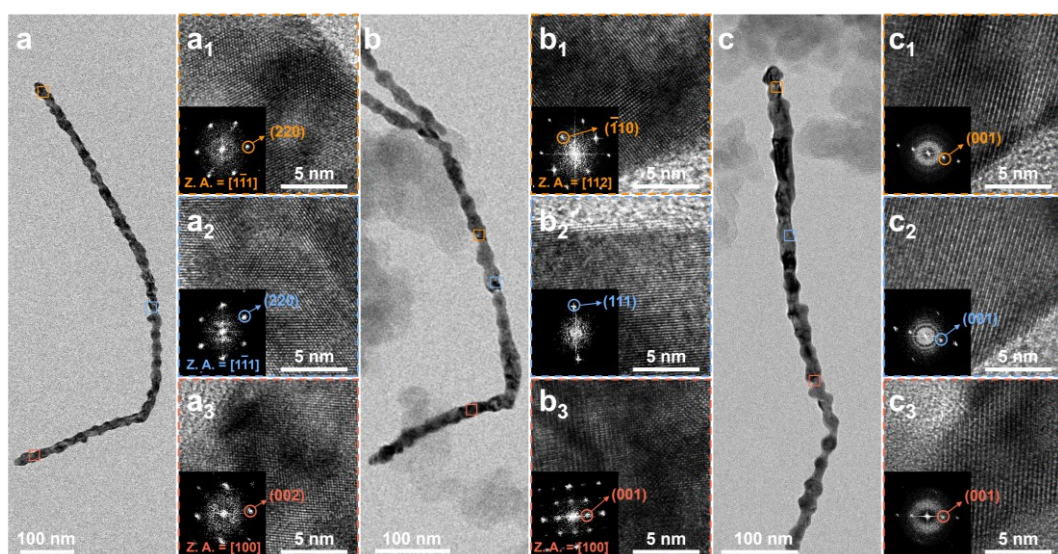

**Figure S15.** (a) TEM image of a representative D-PtNi NWs/C nanowire, along with HRTEM and corresponding FFT images of the regions highlighted in yellow, blue and orange. (b) TEM image of a representative M-PtNi NWs/C nanowire, with HRTEM and corresponding FFT images of the regions highlighted in yellow, blue and orange. (c) TEM image of a representative H-PtNi NWs/C nanowire, and the HRTEM and FFT images of the regions highlighted in yellow, blue and orange.

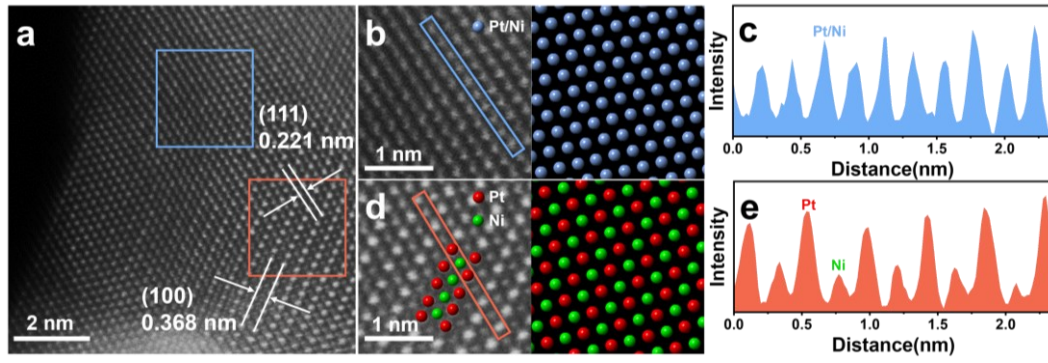

**Figure S16.** (a) High-magnification AC-HAADF-STEM image. (b) Enlarged view of the blue-marked region in (a) with the corresponding atomic configuration of fcc-PtNi. (c) Z-contrast intensity profile extracted from the region in (b). (d) Enlarged view of the orange-marked region in (a) with the corresponding atomic configuration of L<sub>10</sub>-PtNi along the [110] zone axis (e) Z-contrast intensity profile extracted from the region in (d).

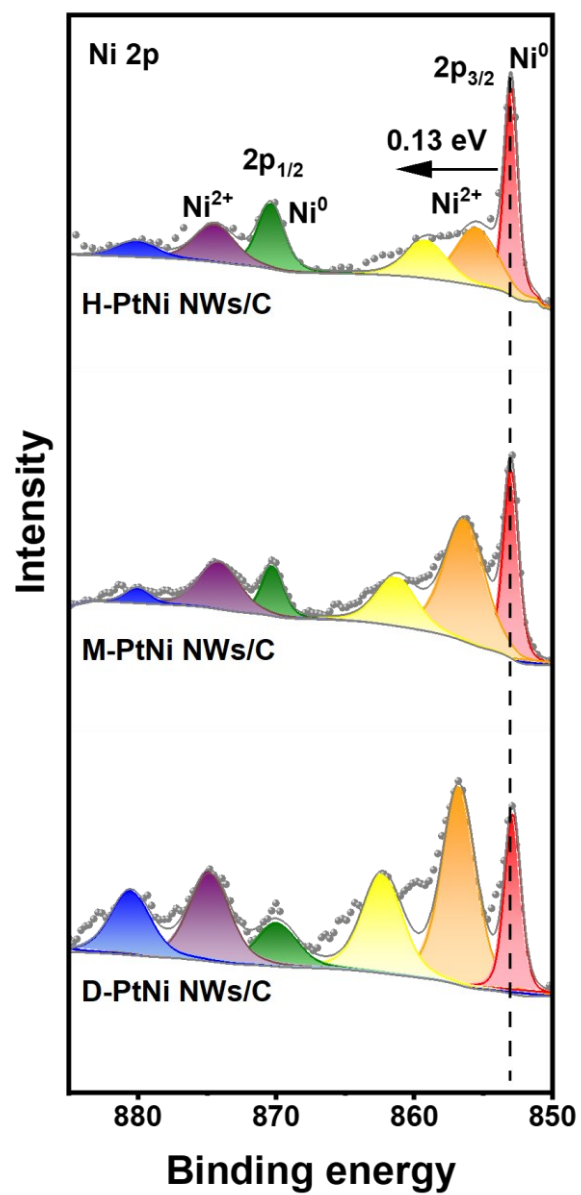

**Figure S17.** The XPS spectra of Ni 2p in (a) D-PtNi NWs/C, (b) M-PtNi NWs/C and (c) H-PtNi NWs/C.

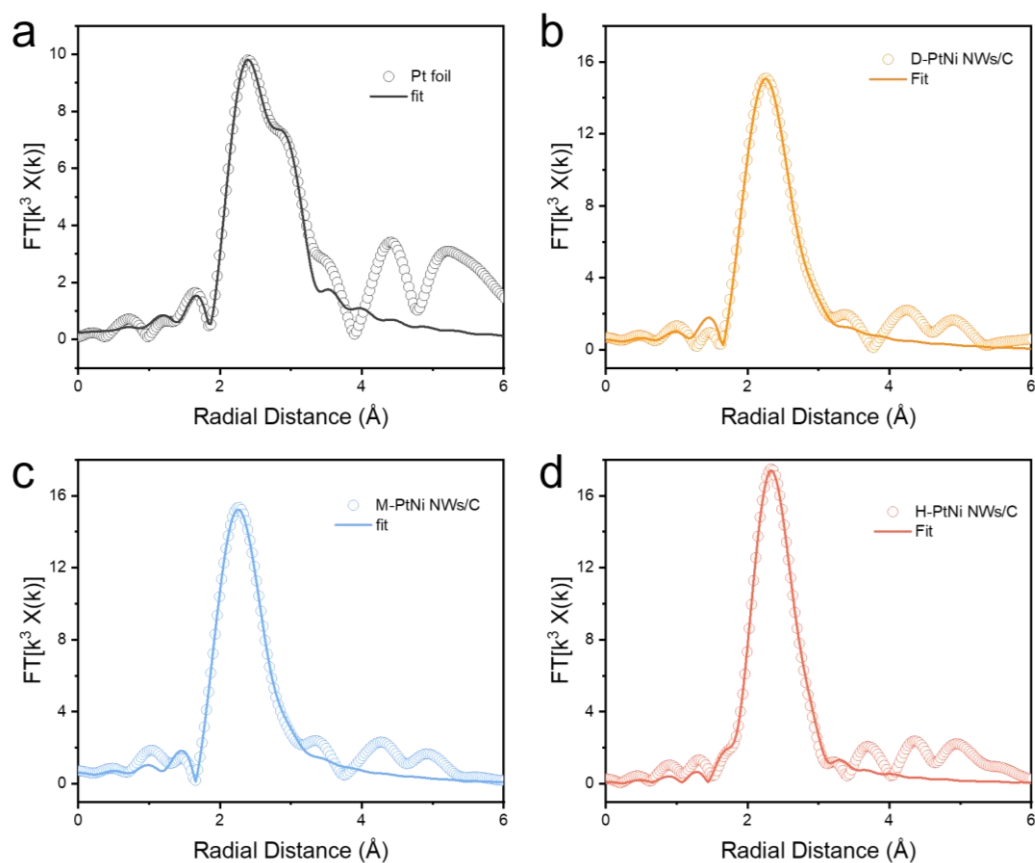

**Figure S18.** R space and inverse FT-EXAFS fitting results of Pt L<sub>3</sub>-edge for (a) Pt foil (FT range: 3.0-10.0 Å<sup>-1</sup>; fitting range: 1.0-3.0 Å), (b) D-PtNi NWs/C (FT range: 3.0-10.0 Å<sup>-1</sup>; fitting range: 1.0-3.0 Å), (c) M-PtNi NWs/C (FT range: 3.0-10.0 Å<sup>-1</sup>; fitting range: 1.0-3.0 Å), (d) H-PtNi NWs/C (FT range: 3.0-10.0 Å<sup>-1</sup>; fitting range: 1.0-3.0 Å).

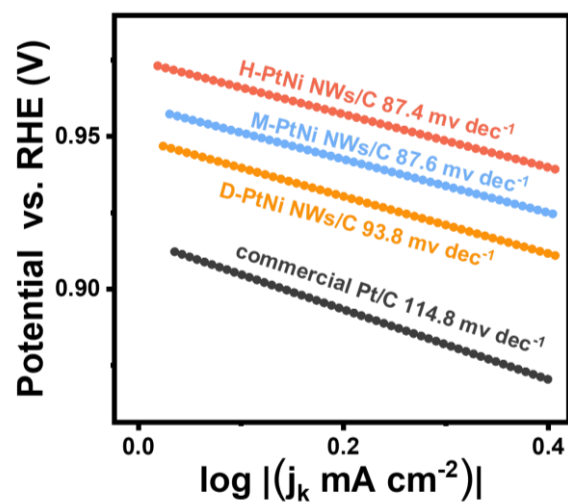

**Figure S19.** Tafel plots of D-PtNi NWs/C, M-PtNi NWs/C, H-PtNi NWs/C and commercial Pt/C.

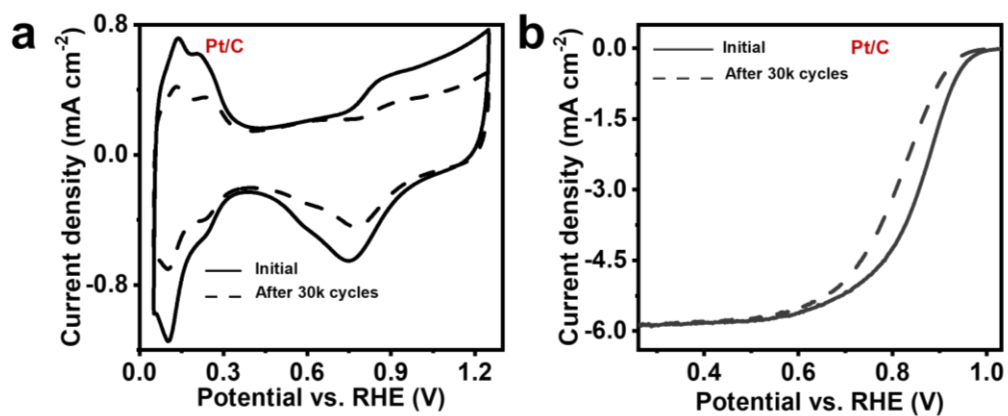

**Figure S20.** (a) CVs, (b) ORR polarization curves of commercial Pt/C before and after 30,000 potential cycles.

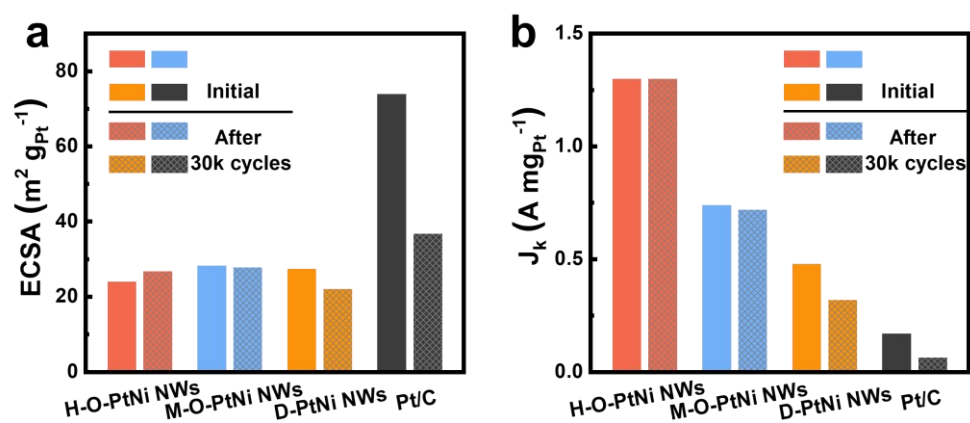

**Figure S21.** The changes in (a) ECSA, (b) mass activities of D-PtNi NWs/C, M-PtNi NWs/C, H-PtNi NWs/C and commercial Pt/C before and after 30,000 potential cycles.



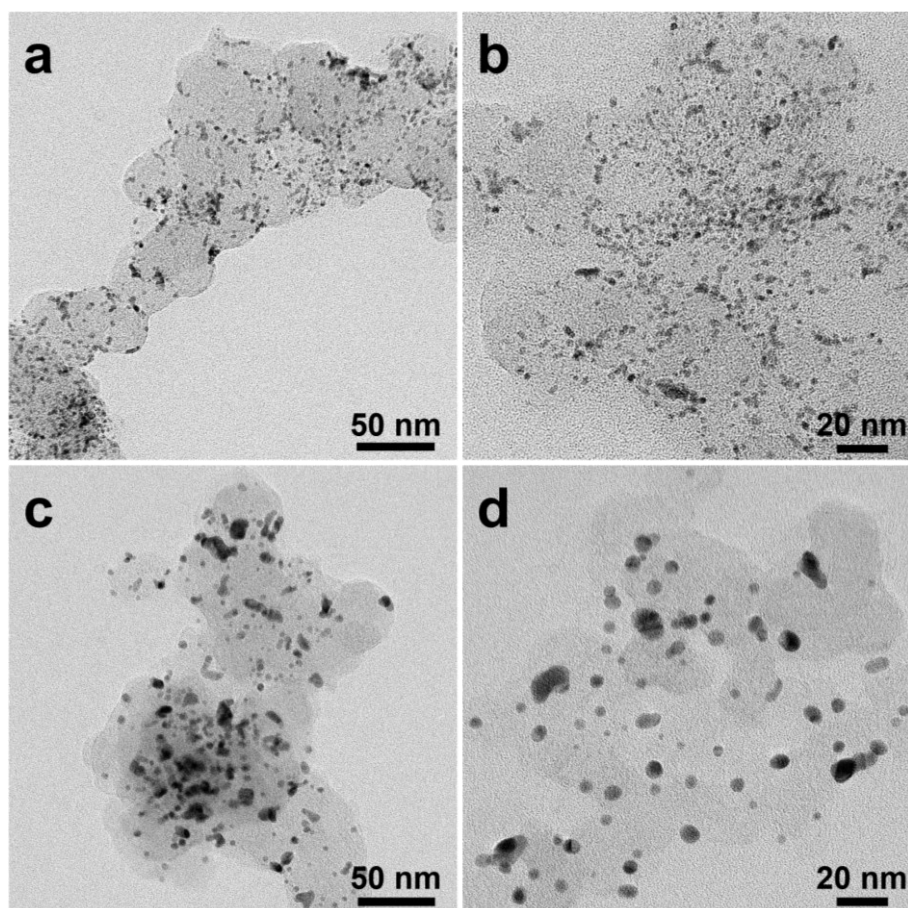

**Figure S22.** (a, b) TEM images of commercial Pt/C. (c, d) TEM images of commercial Pt/C after 30,000 cycles.

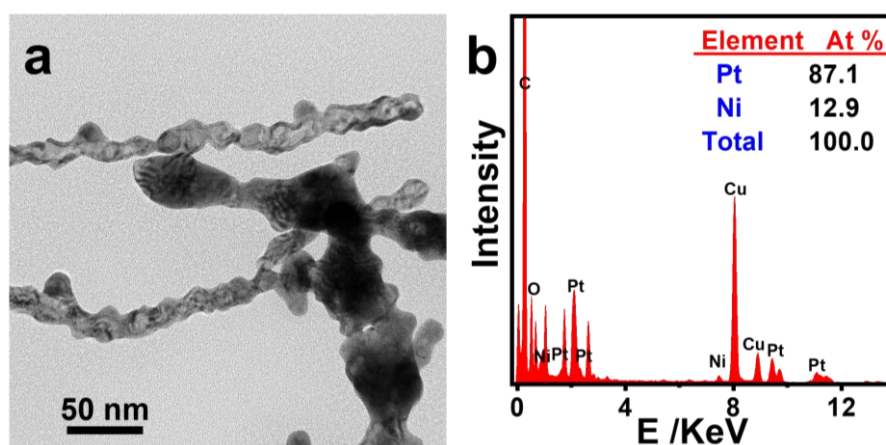

**Figure S23.** (a) TEM image and (b) TEM-EDS pattern of D-PtNi NWs/C after 30,000 cycles.

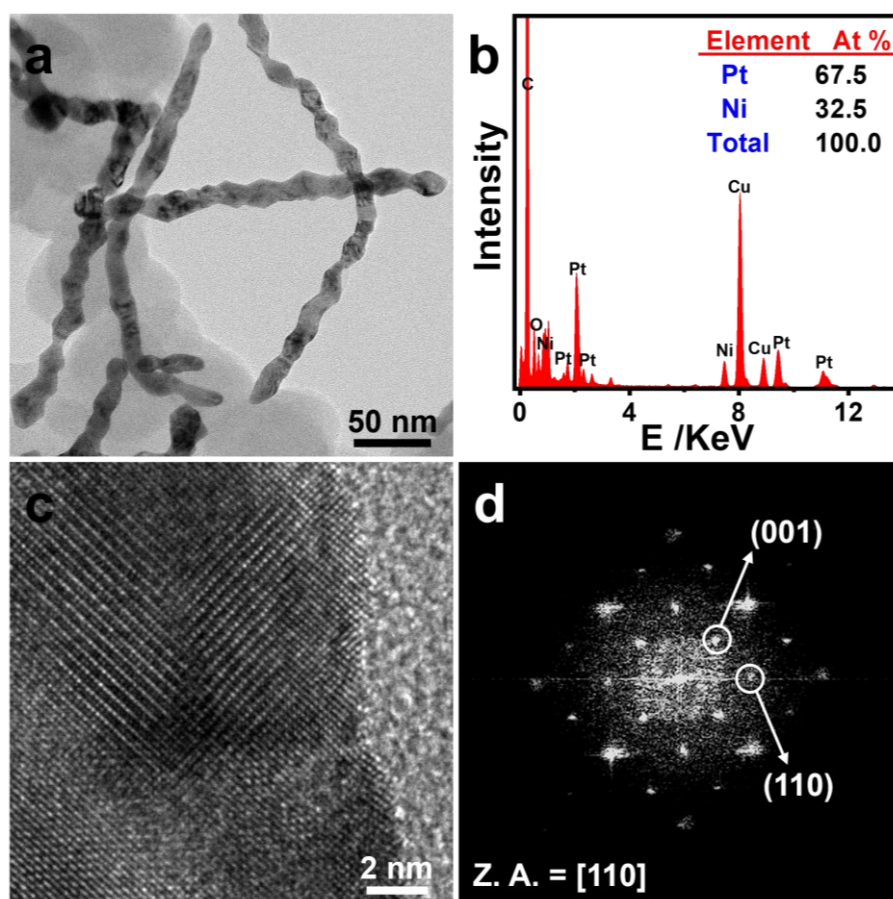

**Figure S24.** (a) TEM image, (b) TEM-EDS pattern, (c) HRTEM image and (d) corresponding FFT pattern of M-PtNi NWs/C after 30,000 cycles.

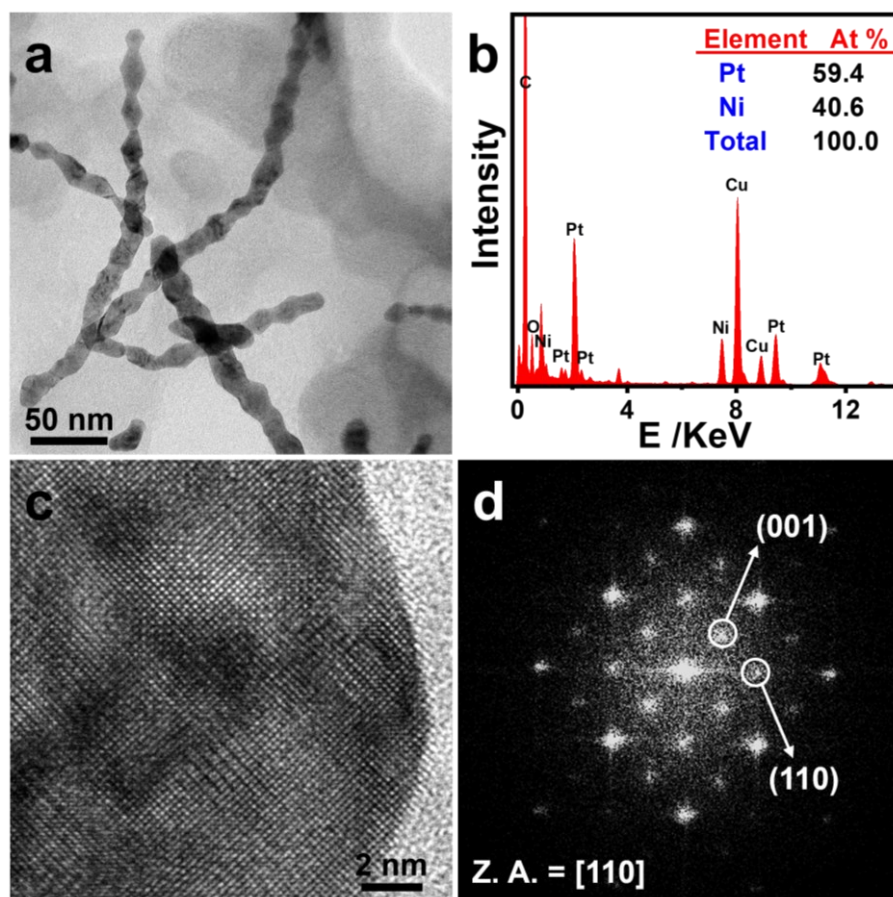

**Figure S25.** (a) TEM image, (b) TEM-EDS pattern, (c) HRTEM image and (d) corresponding FFT pattern of H-PtNi NWs/C after 30,000 cycles.

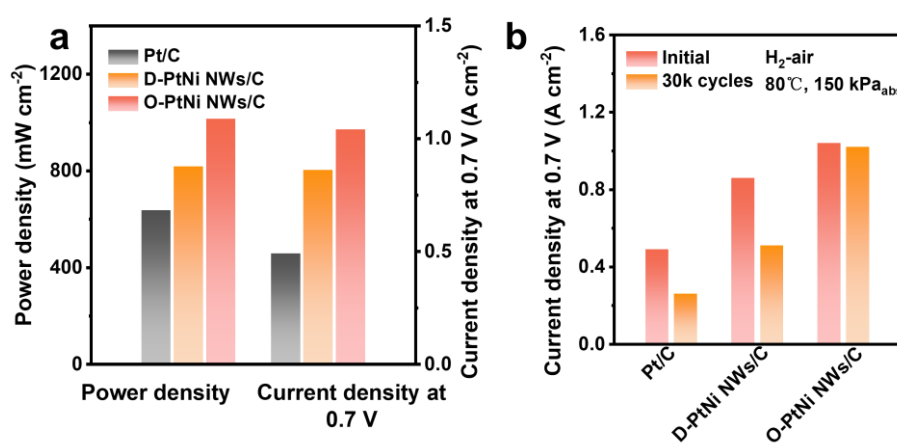

**Figure S26.** (a) Comparison of peak power density and current density at 0.7 V for different catalysts. (b) Changes in current density at 0.7 V of different catalysts before and after the AST.

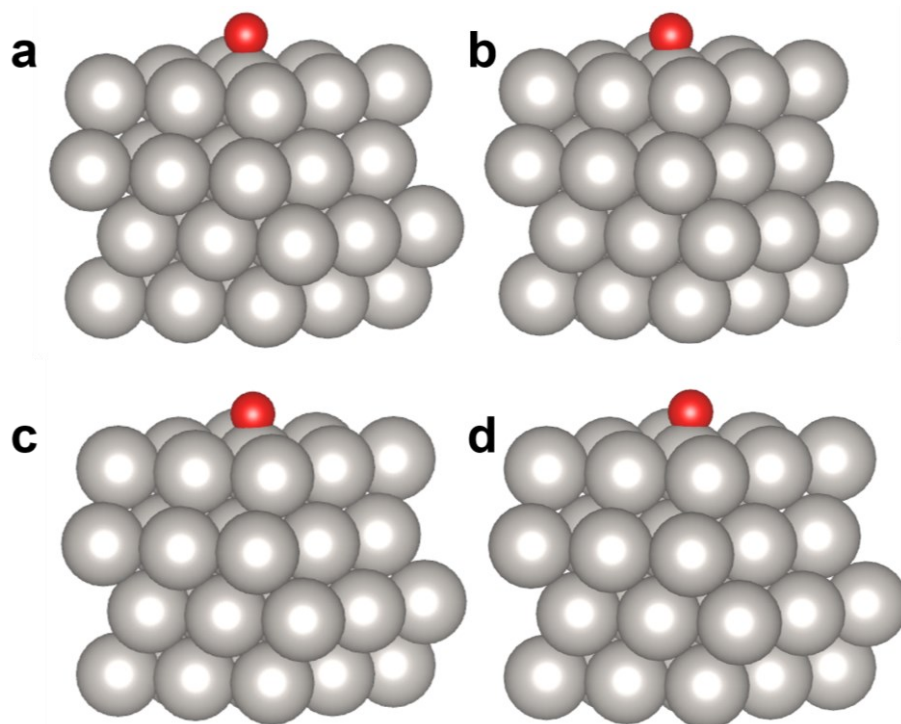

**Figure S27.** Adsorption configurations of O on the Pt(111) surface under (a) 0%, (b) 2%, (c) 5% and (d) 7% compressive strain. Gray and red spheres denote Pt and O atoms, respectively.

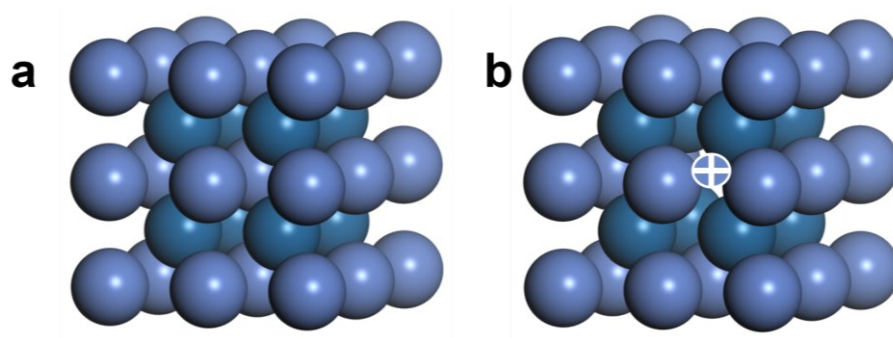

**Figure S28.** (a) Structural model of L<sub>10</sub>-PtNi and (b) L<sub>10</sub>-PtNi model containing a Ni vacancy. Blue and purple spheres represent Pt and Ni atoms, respectively.



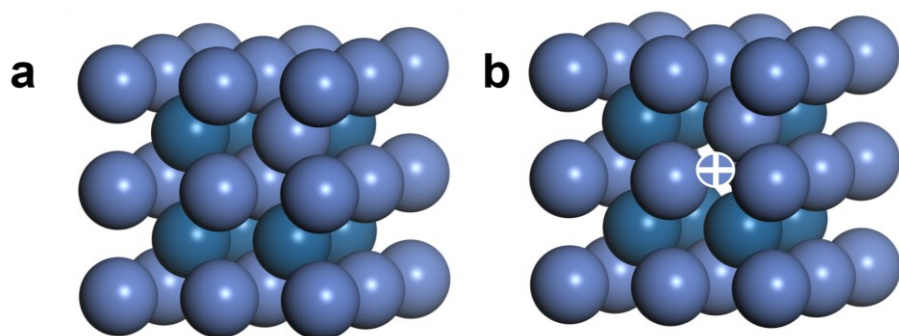

**Figure S29.**(a) Model of L1<sub>0</sub>-PtNi in which one Pt atom adjacent to a Ni atom is substituted by Ni to emulate the local atomic environment of Ni in fcc-PtNi. (b) Corresponding structure shown in (a) with a Ni vacancy. Blue and purple spheres denote Pt and Ni atoms, respectively.

**Table S1.** Surface chemical states of Pt and Ni species in D-PtNi NWs/C, M-PtNi NWs/C and H-PtNi NWs/C determined from XPS analysis.

| Sample       | Pt <sup>0</sup> /Pt <sup>2+</sup> | Ni <sup>0</sup> /Ni <sup>2+</sup> |
|--------------|-----------------------------------|-----------------------------------|
| D-PtNi NWs/C | 50.31/49.69                       | 27.28/72.72                       |
| M-PtNi NWs/C | 83.24/16.76                       | 44.60/55.40                       |
| H-PtNi NWs/C | 88.89/11.11                       | 54.65/45.35                       |

**Table S2.** Structural parameters of Pt foil, D-PtNi NWs/C, M-PtNi NWs/C and H-PtNi NWs/C extracted from the EXAFS fitting ( $S_0^2 = 0.854$ ).

| Sample       | Path  | CN   | R (Å) | $\sigma^2$ (Å <sup>2</sup> ) | $\Delta E$ (eV) | R-factor |
|--------------|-------|------|-------|------------------------------|-----------------|----------|
| Pt-foil      | Pt-Pt | 12   | 2.77  | 0.004                        | 7.86            | 0.0039   |
| D-PtNi NWs/C | Pt-Pt | 3.26 | 2.66  | 0.004                        | 6.32            | 0.0035   |
|              | Pt-Ni | 5.94 | 2.60  | 0.006                        |                 |          |
| M-PtNi NWs/C | Pt-Pt | 3.67 | 2.68  | 0.008                        | 6.81            | 0.0093   |
|              | Pt-Ni | 6.41 | 2.60  | 0.003                        |                 |          |
| H-PtNi NWs/C | Pt-Pt | 3.42 | 2.69  | 0.004                        | 7.34            | 0.0023   |
|              | Pt-Ni | 6.52 | 2.61  | 0.006                        |                 |          |

Note: CN is the coordination number; R is interatomic distance;  $\sigma^2$  is the Debye-Waller factor (a measure of thermal and static disorder in absorber-scatterer distances); R-factor is used to value the goodness of the fitting.

**Table S3.** Structural parameters of D-PtNi NWs/C, I-PtNi NWs/C-2 h, M-PtNi NWs/C, I-PtNi NWs/C-12 h and H-PtNi NWs/C obtained from XRD analysis.

| Sample            | 2theta (°) | d (nm)  | Compressive strain (%) |
|-------------------|------------|---------|------------------------|
| D-PtNi NWs/C      | 42.04079   | 0.21475 | 5.19                   |
| I-PtNi NWs/C-2 h  | 42.01223   | 0.21489 | 5.13                   |
| M-PtNi NWs/C      | 41.98965   | 0.21500 | 5.08                   |
| I-PtNi NWs/C-12 h | 41.96707   | 0.21511 | 5.03                   |
| H-PtNi NWs/C      | 41.92439   | 0.21532 | 4.93                   |

Structural parameters of PtNi nanowire catalysts with different degrees of ordering derived from X-ray diffraction (XRD) analysis. The 2theta values correspond to the (111) diffraction peaks, from which the interplanar spacing was calculated using Bragg's equation. The compressive strain was determined by comparing d (111) with that of pure Pt (0.2265 nm). A gradual decrease in 2theta and corresponding increase in d (111) indicate lattice relaxation as the ordering degree increases.
